# Supplementary material for: High thermoelectric performance of a defect in α-In2Se3-based solid solution upon substitution of Zn for In
Source: Royal Society of Chemistry journal article supplement (doi:10.1039/c5tc01977j), 2015-01-01
Supplement: c5tc01977j6.pdf [file c5tc01977j6.pdf]

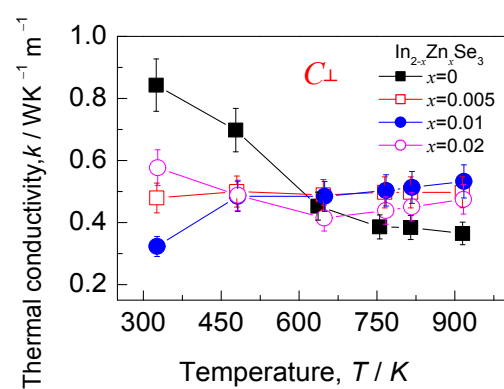

Figure S 6 Total thermal conductivities ( $\kappa$ ) of the  $In_2Zn_xSe_3$  ( $x=0, 0.005, 0.01, 0.02$ ) perpendicular to the pressing direction.
