# Supplementary material for: High thermoelectric performance of a defect in α-In2Se3-based solid solution upon substitution of Zn for In
Source: Royal Society of Chemistry journal article supplement (doi:10.1039/c5tc01977j), 2015-01-01
Supplement: c5tc01977j7.pdf [file c5tc01977j7.pdf]

Table S1 The chemical compositions (relative molars) identified using EPMA for  $\text{In}_{2-x}\text{Zn}_x\text{Se}_3$  ( $x=0.005, 0.01, 0.02$ ) (each taken from a mapping).

| Sample                                          | In    | Zn    | Se    |
|-------------------------------------------------|-------|-------|-------|
| $\text{In}_{1.995}\text{Zn}_{0.005}\text{Se}_3$ | 2.047 | 0.004 | 2.949 |
| $\text{In}_{1.99}\text{Zn}_{0.01}\text{Se}_3$   | 2.051 | 0.008 | 2.941 |
| $\text{In}_{1.98}\text{Zn}_{0.02}\text{Se}_3$   | 2.005 | 0.016 | 2.979 |
