# Supplementary figures and images for: High thermoelectric performance of a defect in α-In2Se3-based solid solution upon substitution of Zn for In
Source: Royal Society of Chemistry journal article supplement (doi:10.1039/c5tc01977j), 2015-01-01

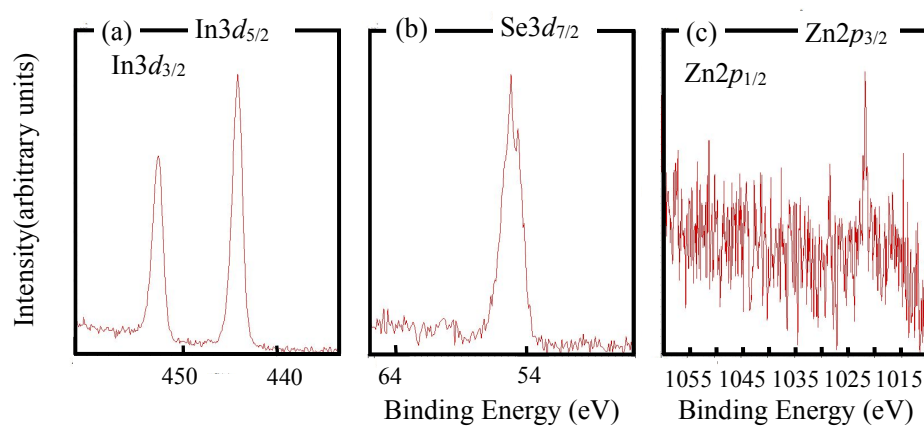

Figure S3 XPS spectra of (a) In 3d, (b) Se 3d, and (c) Zn 2p for  $\text{In}_{1.99}\text{Zn}_{0.01}\text{Se}_3$

Supplement: c5tc01977j3.pdf [file c5tc01977j3.pdf]

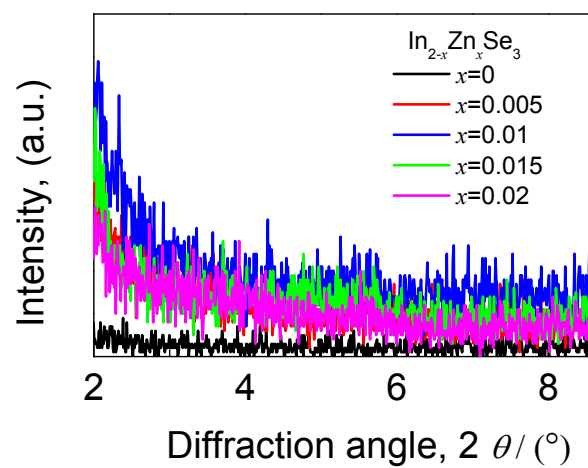

Figure S 4 Small angle X ray diffraction patterns (SAXS) of the  $\text{In}_{2-x}\text{Zn}_x\text{Se}_3$  ( $x=0, 0.005, 0.01, 0.015, 0.02$ ) powders.

Supplement: c5tc01977j4.pdf [file c5tc01977j4.pdf]
